Anhedonia following mild traumatic brain injury in rats: A behavioral economic analysis  
of positive and negative reinforcement

Pelin Avcu<sup>ac#</sup>, Ashley M. Fortress<sup>a#</sup>, Jennifer E. Fragale<sup>ac#</sup>, Kevin M. Spiegler<sup>ac#</sup>,  
Kevin C.H. Pang<sup>abc\*</sup>

<sup>a</sup>NeuroBehavioral Research Lab, Department of Veteran Affairs Medical Center–New  
Jersey Health Care System, East Orange, New Jersey, USA

<sup>b</sup>Department of Pharmacology, Physiology and Neurosciences, New Jersey Medical  
School - Rutgers Biomedical and Health Sciences, Newark, New Jersey, USA

<sup>c</sup>Graduate School of Biomedical Sciences, New Jersey Medical School–Rutgers  
Biomedical and Health Sciences, Newark, New Jersey, USA

#These authors contributed equally.

\*Corresponding Author: Kevin C.H. Pang, Ph.D., [kevin.pang@va.gov](mailto:kevin.pang@va.gov), New Jersey  
Health Care System, 385 Tremont Avenue, Mailstop 15, East Orange, NJ, 07018

Running Title: Effect of mTBI on reinforcement

Table of Contents Title: Effect of mTBI on positive and negative reinforcement

Keywords: Concussion, lateral fluid percussion, depression, motivation, hedonic value

## **Author Contact Information**

Kevin C.H. Pang, Ph.D., [kevin.pang@va.gov](mailto:kevin.pang@va.gov), New Jersey Health Care System, 385 Tremont Avenue, Mailstop 15, East Orange, NJ, 07018

Pelin Avcu, Ph.D., [pelinavcu@gmail.com](mailto:pelinavcu@gmail.com), New Jersey Health Care System, 385 Tremont Avenue, Mailstop 15, East Orange, NJ, 07018

Ashley Fortress, Ph.D., [ashley.fortress@va.gov](mailto:ashley.fortress@va.gov), VA Pittsburgh Healthcare System, University Drive C, Building 30, Pittsburgh, PA 15240

Jennifer E. Fragale, Ph.D., [catuzzje@rutgers.edu](mailto:catuzzje@rutgers.edu), Rutgers University/Rutgers Biomedical and Health Sciences, 683 Hoes Lane West, Office 259A, Piscataway, NJ 08854

Kevin Spiegler, Ph.D., [spiegler@njms.rutgers.edu](mailto:spiegler@njms.rutgers.edu), New Jersey Health Care System, 385 Tremont Avenue, Mailstop 15, East Orange, NJ, 07018

## **Abstract**

Psychiatric disorders affect nearly 50% of individuals who have experienced a traumatic brain injury (TBI). Anhedonia is a major symptom of numerous psychiatric disorders and is a diagnostic criterion for depression. Recently, anhedonia has been divided into consummatory, motivational and decisional components, all of which may be affected differently in disease. Although anhedonia is typically assessed using positive reinforcement, the importance of stress in psychopathology suggests the study of negative reinforcement (removal or avoidance of aversive events) may be equally important. The present study investigated positive and negative reinforcement following a rat model of mild TBI (mTBI) using lateral fluid percussion. Hedonic value of and motivation for reinforcement was determined by behavioral economic analyses. Following mTBI, the hedonic value of avoiding foot shock was reduced. In contrast, the hedonic value of escaping foot shock or obtaining a sucrose pellet was not altered by mTBI. Moreover, neither motivation to avoid or escape foot shock nor motivation to acquire sucrose was modified by mTBI. Our results suggest that individuals experiencing mTBI may experience more stress because of poor proactive control of stress resulting from reduced hedonic value of avoiding aversive events.

## Introduction

Traumatic brain injury (TBI) is one of the leading causes of disabilities and deaths worldwide and in the US.<sup>1</sup> Among the disabilities, psychiatric disorders are common, estimated to occur in nearly 50% of those experiencing a TBI.<sup>2</sup> Moreover, major depression is observed in approximately 40% of those hospitalized for TBI.<sup>3</sup> Thus, understanding the mechanisms by which TBI leads to depression and other psychiatric disorders is increasingly necessary.

Anhedonia is a prominent feature of depression and may be important in the co-morbidity that is often observed with anxiety disorders.<sup>4</sup> Recently, the study of reinforcement has indicated multiple components of anhedonia.<sup>5, 6</sup> Consummatory, motivational and decisional components of anhedonia can be independently altered in psychopathology.<sup>7</sup> Patients with schizophrenia have relatively normal hedonic experiences (consummatory component), but are impaired in making optimal decisions when comparing values of different items (decisional component).<sup>8</sup> Addiction is associated with an increased desire (motivational component) and activation of motivational brain circuits in response to drug cues.<sup>9</sup> Finally, individuals with depression have reduced motivation to work for monetary reward.<sup>10</sup> Because of the various aspects of anhedonia, the identification of the aspect(s) of anhedonia that is(are) disrupted by TBI may allow for better treatment of TBI-induced depression.

The study of anhedonia in experimental models of TBI are relatively few. Controlled cortical impact (CCI) injury to the medial frontal cortex reduced the preference for

saccharine 8 days after injury, and CCI injury of the parietal cortex reduced sucrose preference 5.5 months after injury.<sup>11, 12</sup> Similarly, lateral fluid percussion injury reduced sucrose preference 4 days after injury, an effect that was reversed by fluoxetine. Midline fluid percussion reduced preference for sucrose 30 days after injury when combined with an immune challenge of lipopolysaccharide (LPS) administration, as compared to an LPS sham group.<sup>13, 14</sup> In contrast, other studies found that lateral fluid percussion injury did not alter sucrose preference at 1, 3 or 6 months after injury, and neither mild nor severe CCI altered preference for sucrose 16 days after injury in mice.<sup>15, 16</sup> All of these prior studies evaluated anhedonia using a sucrose or saccharine preference test; a test that does not assess different components of reinforcement. Therefore, the present study utilized behavioral economics analysis to investigate changes in consummatory and motivational components of reinforcement following mTBI.<sup>7, 17</sup>

Reinforcement can be divided into positive and negative reinforcement. Presentation of a desirable stimulus (positive reinforcement) or removal of an undesirable stimulus (negative reinforcement) increases the likelihood of the response that produced the reinforcement. With regard to psychopathology, much more is known about positive reinforcement as compared to negative reinforcement. Positively-valenced items have lower ratings and are less arousing to individuals with depression.<sup>7</sup> Whether anhedonia in depression is specific to positively-valenced items or due to a global flattening of both positive and negative valence items needs further investigation.<sup>18</sup> Similarly, anxiety is often associated with negative bias, whereby individuals have enhanced attention to

and motivation to remove negatively-valenced items.<sup>19-22</sup> Importantly, anhedonia was a predictor for time to remission, was inversely correlated with depression-free days in SSRI-resistant adolescents, and may be a predictor of successful outcome following intravenous subanesthetic ketamine treatment in patients with treatment-resistant depression.<sup>23, 24</sup> Therefore, the study of reinforcement may prove insightful in understanding mood disorders caused by TBI.

Stress often results from encountering aversive events, and can be a precipitating factor in depression and anxiety.<sup>25, 26</sup> Cognitive control refers to the adaptive changes required to accomplish our goals in the face of challenges and conflicts, and is related to emotion and stress regulation.<sup>27</sup> Cognitive control includes both reactions to current stressful events (reactive control) and anticipation of a future stressful event (proactive control), each of which may use different but potentially overlapping brain regions.<sup>28</sup> Critically, reduced proactive control may limit individuals with depression to successfully cope with stress.<sup>29</sup>

Recently, we described a novel procedure to assess two forms of negative reinforcement using a behavioral economics analysis.<sup>30, 31</sup> Escape and avoidance of foot shock have similarities to reactive and proactive control of stress, respectively. In escape from foot shock, rats lever press to terminate foot shock, representing control of an “in the moment” stressor. In avoidance of foot shock, rats learn to press a lever to prevent foot shock from occurring, representing control of a future stressful event. As applied to a rodent model of anxiety vulnerability, a stress-sensitive, anxiety vulnerable

rat strain (Wistar Kyoto rat, WKY) was more motivated to work for negative reinforcement (escape and avoidance of foot shock) than a normal outbred Sprague Dawley rat strain.<sup>30, 31</sup> In contrast, WKY rats were less motivated to obtain positive reinforcement (sucrose pellet) as compared to Sprague Dawley rats, demonstrating a negative bias in motivation to acquire reinforcement.<sup>30</sup> The reinforcing (hedonic) values of positive or negative reinforcement were not different between strains.<sup>30, 31</sup> These results demonstrate the importance of separating motivational and consummatory (hedonic value) components of reinforcement and the relevance of investigating positive and negative reinforcement in psychopathology.

The present study evaluated the effects of mTBI on positive and negative reinforcement using behavioral economics analyses. Based on prior studies that investigated the effects of TBI on sucrose preference, it was hypothesized that mTBI would cause anhedonia for positive reinforcement, but whether this effect would appear as reduced hedonic value or motivation was unclear. Moreover, no prior studies to our knowledge have investigated negative reinforcement following mTBI. Because of the lack of studies in this area, the present study will provide novel information on the aspects of positive and negative reinforcement that are impaired following mTBI with potential relevance to treatment of depression.

## **Materials and Methods**

### **Subjects**

Forty-four male Sprague Dawley rats (approximately 3 months of age, 250 – 300 g at the start of the studies; Envigo, Indianapolis, IN) were housed individually in a room with a 12:12 hour light:dark cycle. One rat did not learn to lever press for sucrose and was removed from the study, resulting in 6 Sham and 5 TBI rats in Experiment 1. Two rats died after the TBI/Sham surgery, resulting in 7 Sham and 8 TBI rats for Experiment 2 and the same numbers for Experiment 3. Food and water were available *ad libitum*, except during training and testing with sucrose reinforcement. For procedures using sucrose reinforcement, rats were restricted of food to maintain a body weight that was 85% of the *ad libitum* weight. All procedures were conducted in accordance with the NIH Guide for the Care and Use of Laboratory Animals and approved by the IACUC of the Veterans Affairs Medical Center at East Orange, New Jersey.

#### Acoustic Startle Reflex

All rats were assessed for acoustic startle reflex (ASR) because we previously found suppression of ASR to be a consistent outcome of mTBI following lateral fluid percussion injury.<sup>32-34</sup> Assessment of ASR was performed as previously described.<sup>32</sup> ASR was assessed in individual, sound-attenuated chambers, each equipped with an exhaust fan, one speaker to maintain background noise (68dB) and another speaker for delivery of the acoustic stimuli (86, 96, and 102dB; 100 ms). A single session consisted of 24 trials (8 repetitions of 3 intensities), in which the acoustic stimulus was presented immediately after a 250ms baseline period. Trials occurred every 25-35 seconds in a pseudo-randomized order. Rats were loosely restrained on platforms that transduced whole body force (Coulbourn Instruments, Holliston, MA). Movement was considered a



startle response if the magnitude exceeded the sum of the maximum magnitude during the baseline period and 4x the standard deviation of baseline activity. Two dependent measures were obtained: sensitivity and magnitude. ASR sensitivity was the probability of a startle response to an acoustic stimulus (expressed as a percentage at each stimulus intensity). ASR magnitude was the amplitude of the startle response at each stimulus intensity, and was corrected for the subject's body weight. ASR magnitude was calculated only for those trials in which a startle response was detected. If no responses were elicited for all trials of a stimulus intensity, ASR magnitude was assigned a value of 0 for that subject. ASR was measured before injury, and 1, 7 and 14 days after injury. The pre-injury startle magnitude at 102 dB was used to match rats and then randomly assign matched rats to sham and mTBI groups.

## Surgery

All rats underwent TBI/sham procedures prior to behavioral training and testing (except for ASR). Rats were prepared for lateral fluid percussion injury, as previously described.<sup>32, 35</sup> Briefly, rats were anesthetized with a mixture of ketamine and xylazine (60 mg/7 mg per kg body weight, 1 ml/kg, i.p.). A craniectomy was created in the left or right parietal bone plate (4 mm diameter, centered at -3.0mm posterior to and  $\pm 3.5$ mm lateral to Bregma). Left and right craniectomy locations were counterbalanced across animals. A Luer-Lok connector was glued to the skull surrounding the craniectomy. A plastic cylinder (cut from a 12 ml syringe) surrounded the craniectomy to protect the Luer-Lok connector. Dental cement was used to stabilize the plastic cylinder and Luer-

Lok connector to the skull. A small piece of Kimwipe was inserted into the connector to keep the dura clean of debris.

### Fluid Percussion Injury

mTBI was produced using lateral fluid percussion, a well-established experimental model of TBI that produces a focal injury, modeling a clinical contusion injury without skull fracture.<sup>36-38</sup> Subjects were anesthetized with 5% isoflurane and Luer-Lok hub connected to the device. As soon as rats recovered a foot-pinch reflex bilaterally, a fluid pressure pulse was delivered to the dura using a computer controlled voice-coil injury device (Table 1).<sup>39</sup> After delivery of the impact, duration of apnea was recorded, rats were laid supine and the latency of their righting reflex (in the absence of any tactile stimulation) was recorded. Sham control subjects also underwent surgery and isoflurane anesthesia, and were attached to the device. However, a fluid pressure pulse was not delivered. Therefore, only latency of the righting reflex was recorded for Sham controls as a measure of the effects of anesthesia alone.

### Behavioral Training and Testing

The primary focus of these studies was to assess demand characteristics of positive and negative reinforcement after mTBI. We were interested in the post-acute phase so the demand curve was obtained between 3 weeks to 1 month after injury. However, additional testing also occurred prior to this time, as detailed in Table 2.

### Experiment 1: Behavioral Economics of Positive Reinforcement

Sucrose Preference. Six sham and five mTBI rats were measured for their preference for sucrose using procedures described previously.<sup>15</sup> Rats were presented with two identical water bottles in their home cage. One bottle was filled with tap water and the other filled with 1% sucrose in tap water. Rats were acclimated to the bottles for the first day, and fluid intake was measured during the second day for 24 hours. The position of the water bottles was exchanged after 12 hours during the measurement period. Preference was calculated by the following equation:  $(\text{volume sucrose consumed} - \text{volume water consumed}) / (\text{volume sucrose consumed} + \text{volume water consumed}) \times 100$ .

Initial FR-1 training. After assessment of sucrose preference, rats were trained to lever press for sucrose pellets using procedures and equipment described previously.<sup>30</sup> Rats were trained in an operant box that contained a lever (10.5 cm above the floor) on one wall and a house light and speaker (26 cm above the floor) on the opposite wall. A food trough was located below the lever. The operant box was housed in a sound attenuating chamber (Coulbourn). Initial training occurred in 5 daily sessions using a fixed ratio 1 (FR-1) schedule. The presentation of an auditory stimulus (1 kHz, 75 dB) signaled the opportunity to receive reinforcement. A single lever press caused the delivery of a sucrose pellet (45 mg) and then a 20 second intertrial interval (ITI) that was signaled by a flashing light (5 Hz). All stimuli and food dispensers were controlled by Graphic State Notation (Version 4, Coulbourn Instruments). A session consisted of 24 completed trials or 90 minutes, whichever occurred first. Time to criterion (24 reinforced trials) was used to assess learning. Rats unable to obtain 24 reinforced trials by the end of the session were given a score of 90 minutes. By the end of training, mean

completion time for a session was  $13.8 \pm .95$  and  $16.4 \pm 2.38$  minutes for Sham and mTBI, respectively. One mTBI rat was unable to complete the 24 trials within 30 minutes so its data were not included in any of the analyses, leaving 6 Sham and 5 mTBI rats.

Modified Progressive Ratio Testing. After FR-1 training, rats were tested in a modified progressive ratio procedure, in which positive reinforcement was delivered after increasing numbers of lever presses. The requirement for reinforcement was increased every 6 trials in the following manner: 1, 2, 3, 5, 10, 18 and 32 presses. The lever press requirement increased incrementally regardless of performance. Each rat was tested on 3 daily sessions of the modified progressive ratio procedure to obtain a demand curve function.

Behavioral economics theory is based on the idea that consumption decreases as the price for goods increases. Here, the nature of the relationship between consumption and price is defined by the demand curve. Consumption is the amount of sucrose pellets obtained, expressed as the probability of reinforcement for each trial for a given price. Price is defined as the amount of work required to obtain goods, expressed as the number of lever presses required to receive a sucrose pellet. The exponentiated demand equation was used in this behavioral economics analysis because it allows the use of consumption values equal to 0.<sup>30, 40</sup> The exponentiated demand equation is

$$Q = Q_0 \cdot 10^{k(e^{-aQ_0C} - 1)},$$

where Q is a measure of consumption of reinforcement, C is the amount of work required to receive reinforcement, and k is a constant that represents the range of

consumption and is shared across all subjects.  $Q_0$  and  $\alpha$  are determined from the best fit of the exponentiated demand equation to the composite demand curve.  $Q_0$  is the consumption of a reinforcer when no effort is required to obtain the reinforcement.

While this is a theoretical construct, it is useful as a measure of the hedonic value of a reinforcer.  $\alpha$  is a measure of demand elasticity, which describes how rapidly consumption decreases as price increases, and serves as an inverse measure of motivation for obtaining reinforcement. Behavioral economics principles, as well as  $Q_0$  and  $\alpha$ , have been widely used to describe positive reinforcement.<sup>17, 41-43</sup>

Foot Shock Sensitivity Testing. In order to provide information for Experiments 2 and 3, rats in Experiment 1 were assessed for sensitivity to foot shock after Modified Progressive Ratio testing with sucrose. Foot shock sensitivity was assessed in an operant box with grid floors capable of delivering scrambled foot shock (Coulbourn Instruments, Whitehall, PA), as described previously.<sup>31</sup> Vocalization and flinch to incrementing shock intensities (0.1 mA steps, 0.1 – 1.0 mA range, 0.5 s duration, 10 s between shocks) were scored by two observers. Each shock intensity was repeated twice. Vocalization was recorded when the animal made an audible vocalization upon shock delivery. A flinch was recorded when the animal visibly tensed its limb muscles immediately upon shock delivery. Threshold was determined to be the lowest shock intensity at which both observers independently agreed on the occurrence of a vocalization or body flinch.

Experiment 2: Behavioral Economics of Negative Reinforcement – Escape from Foot

## Shock

Initial FR-1 training. A separate group of rats ( $n = 7$  sham and 7 mTBI) were trained to lever press in order to escape foot shock. Training occurred as described previously.<sup>30</sup> The operant box was similar to that used in Experiment 1, except without a food trough and with a floor grid that was capable of delivering scrambled foot shock. Rats were trained to press a lever to escape foot shock in 5 daily sessions using an FR-1 schedule. Trials started with foot shock (1.0 mA, 0.5 s duration, 3.5 s intershock interval) paired with a 1 kHz tone (75 dB, continuous). A single lever press immediately terminated the foot shock and auditory stimulus, and initiated a 180 s ITI signaled by a flashing light (5 Hz). A maximum of 20 foot shocks were allowed per trial, after which foot shock and auditory stimulus was terminated, and the ITI initiated. Each session consisted of 25 trials. None of the rats failed to respond on more than 10% of the trials by the end of training.

Modified Progressive Ratio Testing. Similar to Experiment 1, a modified progressive ratio procedure was used to construct a demand curve for escape foot shock. The number of lever presses required to terminate foot shock incremented every 6 trials in the following manner: 1, 2, 3, 5, 10, 18 and 32. Each rat was tested on 3 daily sessions of modified progressive ratio testing.

Experiment 3: Behavioral Economics of Negative Reinforcement – Avoidance of Foot Shock

Initial FR-1 training. A separate group of rats ( $n = 7$  sham and 8 mTBI) was trained on a lever press avoidance procedure, as described previously.<sup>31</sup> Training occurred in the same operant boxes as in Experiment 2. Each trial was initiated by the presentation of an auditory stimulus (1 kHz, 75dB tone) without foot shock. Foot shocks (1.0 mA, 0.5 s duration, 1 shock/3.5 s) commenced 72 s after the onset of the auditory stimulus. The auditory stimulus continued into the shock period. A single lever press after the start of the trial and prior to the initiation of foot shock was recorded as an avoidance response; the avoidance response terminated the auditory stimulus and initiated a 180 s ITI. The ITI was signaled by a flashing light (5 Hz). A single lever press after the start of foot shock terminated shock and the auditory stimulus, and initiated the ITI. Responses during the shock period were recorded as escape responses. If the lever was not pressed after 20 footshocks (72 s), the auditory stimulus and shock were terminated and the ITI commenced. This lack of response was considered a failure. The flashing light was present during the ITI regardless of whether the animal avoided, escaped or failed to respond on the trial. Each training session consisted of 25 trials. Rats were trained for 10 sessions, and sessions occurred 3 times per week with a minimum of 48 hours between sessions, as in previous studies.<sup>44</sup>

Modified Progressive Ratio Testing. A modified progressive ratio procedure was used to construct a demand curve for avoiding foot shock, similar to that described for escape from foot shock. Rats were tested in the same operant boxes as during FR-1 training. The procedure was identical to that described for the FR-1 avoidance training, except the number of lever presses to avoid foot shock was increased in the following manner:

1, 2, 3, 5, 10, 18 and 32. The number of lever presses incremented every 6 trials regardless of performance. Throughout the testing session, a single lever press was necessary to terminate foot shock during the shock period (escape response). Each rat was tested on 3 sessions of the modified progressive ratio schedule with 48 hours between sessions.

## Data Analysis

Statistical Analysis. Statistical analyses of ASR, sucrose preference, foot shock sensitivity, acute injury measures and FR-1 training were performed using SPSS for Windows (v 12.0.1). ASR sensitivity and magnitude were analyzed in a 2 x 4 x 3 mixed design ANOVA, with between-subjects factor of injury (2 levels: SHAM or mTBI) and within-subject factors of day of measurement (4 levels: pre-injury, 1, 7 and 14 days after injury) and stimulus intensity (82, 92, 102dB). Data from FR-1 training was assessed using a 2 x 5(or 10) mixed design ANOVA, with between subjects factor of injury (2 levels: SHAM or mTBI) and a within subject factor of session (5 levels for Experiments 1 and 2 and 10 levels for Experiment 3). Because these studies focused on the effect of mTBI, only main effects and interactions involving the injury factor are reported. Two-tailed independent samples t-tests were conducted for sucrose preference, foot shock sensitivity, and acute measures of fluid percussion impact. Statistical significance was reached when  $p < .05$ .



Behavioral Economics. Each rat was tested in the modified progressive ratio procedure for 3 sessions. Data from the three sessions were combined to create a demand curve for each rat. A composite demand curve was then constructed from all rats for each group. The exponentiated demand equation was fit to the composite demand curve using a modified GraphPad Prism (v. 6.0 h) template from the Institutes for Behavioral Resources. The measures of hedonic value  $Q_0$  and elasticity  $\alpha$  for sham and mTBI groups were obtained from the best fit of the exponentiated demand equation to the composite demand curve for each group. All fits of the equation to actual data were excellent ( $r^2$  between 0.84 and 0.99). Statistical interpretations of  $Q_0$  and  $\alpha$  were obtained from the Extra Sum of Squares F-test (GraphPad Prism, v. 6.0h). Statistical significance was reached when  $p < .05$ .

## **Results**

A timeline of the behavioral procedures for the three experiments is presented in Table 2.

Experiment 1: Behavioral Economics of Positive Reinforcement

Injury Severity and Acute Signs. As measures of injury severity, impact pressures and acute signs of injury were recorded and are summarized in Table 1. Time to recover righting reflex was significantly longer for mTBI compared to sham ( $t(9) = -7.9$ ,  $p < .001$ ).

Acoustic Startle Response. We have previously reported a long-lasting suppression of ASR following mTBI after lateral fluid percussion injury.<sup>32-34</sup> In the present study, we used ASR suppression as an additional measure of injury. ASR sensitivity and magnitude were evaluated up to 14 days following injury (Figure 1). Similar to our previous studies, ASR sensitivity was suppressed following mTBI, as supported by a main effect of injury ( $F(1,9) = 22.7, p = .001$ ), an injury X day interaction ( $F(3,27) = 5.3, p = .005$ ) and an injury X stimulus intensity interaction ( $F(2,18) = 7.5, p = .004$ ). The triple interaction of injury X day X stimulus intensity trended toward significance ( $F(6,54) = 2.0, p = .08$ ).

Similar to ASR sensitivity, magnitude of ASR was suppressed following mTBI. The significant interaction of injury X day ( $F(3,27) = 3.8, p = .021$ ) supported the adverse effect of mTBI. The main effect of injury ( $F(1,9) = 4.2, p = .07$ ) trended toward significance. All other interactions involving injury were not significant. Thus, suppression of both ASR sensitivity and magnitude resulted from lateral fluid percussion injury.

Sucrose Preference. Sucrose preference was assessed 9 days after injury. Both Sham and mTBI rats preferred the sucrose solution, and the two groups did not differ in their preference ( $t(9) = 1.2, p = .261$ ) or total amount of liquid consumed ( $t(9) = -1.0, p = .336$ ) (Table 3).

FR-1 Training. Rats were trained to lever press for sucrose pellets in 5 sessions using an FR-1 reinforcement schedule. Learning was assessed by the time to reach a

criterion of 24 reinforced trials (data not shown). Sham and mTBI groups decreased time to complete the session with training (main effect of session,  $F(4,36) = 18.6$ ,  $p < .001$ ), and learning was not different between groups, as the main effect of injury and injury X session interaction were not significant ( $ps > 0.05$ ).

Demand characteristics for Positive Reinforcement - Sucrose. Effects of mTBI on the reinforcing properties of positive reinforcement were evaluated in a modified progressive ratio schedule for sucrose pellets. Demand characteristics were obtained for Sham and mTBI rats (Figure 2).  $Q_0$ , a measure of the hedonic value of sucrose, was not different between Sham and mTBI rats ( $F(1,10) = 0.82$ ,  $p = .385$ ).  $\alpha$ , a measure of elasticity that is inversely related to motivation, was also not different between Sham and mTBI groups ( $F(1,10) = 0.43$ ,  $p = .527$ ). Fit of the exponentiated equation to actual data was excellent ( $r^2$  for sham = 0.93 and mTBI = 0.96).

Sensitivity to Foot Shock. As a prelude to Experiments 2 and 3, rats from Experiment 1 were evaluated for their sensitivity to foot shock by assessing threshold to flinch and vocalize in response to varying levels of foot shock. Mean foot shock threshold values are presented in Table 3. Sham and mTBI groups did not differ in the threshold to vocalization ( $t(9) = 1.8$ ,  $p = .104$ ) or flinch ( $t(9) = .201$ ,  $p = .845$ ). Thus, the results support the view that mTBI did not change the sensitivity to foot shock.

In summary, the results of Experiment 1 demonstrated that mTBI caused a suppression of ASR, but did not alter reinforcement value or motivation to obtain positive (sucrose)

reinforcement. Additionally, mTBI did not modify their preference for drinking sucrose water or sensitivity to foot shock.

Experiment 2: Behavioral Economics of Negative Reinforcement - Escape from Foot Shock.

Injury severity and Acute Signs. Impact pressures and acute signs for Experiment 2 are summarized in Table 1. Latency to recover the righting reflex was significantly longer for mTBI compared to sham ( $t(12) = -4.62, p = .001$ ).

Acoustic Startle Response. ASR sensitivity for rats in Experiment 2 was not suppressed following mTBI, as the main effect of injury and all interactions involving injury were not significantly different between sham and TBI groups. In contrast, ASR magnitude was suppressed by mTBI, as demonstrated by a significant main effect of injury ( $F(1,13) = 7.7, p = .016$ ) and interactions of injury X day ( $F(3,39) = 4.0, p = .015$ ), injury X stimulus intensity ( $F(2,26) = 8.4, p = .002$ ) and injury X day X stimulus intensity ( $F(6,78) = 2.3, p = .04$ ). Thus, mTBI significantly suppressed ASR, although the effect was only observed for the magnitude of ASR (Figure 1). This was not surprising since we have previously observed that the effects of mTBI on ASR are greater for magnitude than for sensitivity.<sup>32, 33</sup>

FR-1 Training. Sham and mTBI rats were trained to lever press to escape foot shock using an FR-1 reinforcement schedule. Learning performance was assessed by calculating the proportion of trials with an escape response (data not shown). Both

groups learned the escape response with training (main effect of session,  $F(4,52) = 15.3$ ,  $p < .001$ ), but acquisition of escape was not different between Sham and mTBI groups, as the main effect of injury and the injury X session interaction were not significantly different.

Demand Characteristics of Negative Reinforcement – Escape from Foot Shock. The effects of mTBI on the reinforcing properties of escape from foot shock was investigated using a modified progressive ratio procedure (Figure 3).  $Q_0$  was not different between Sham and mTBI rats ( $F(1,10) = 0.005$ ,  $p = .978$ ).  $\alpha$  for escaping foot shock was also not different between groups ( $F(1,10) = 0.1$ ,  $p = .754$ ). The fit of the exponentiated equation to the actual data was very good ( $r^2$  for sham = 0.93 and mTBI = 0.84). Thus, mTBI did not alter the hedonic value or motivation of escaping from foot shock, evidence that reactive control of stress was not altered by mTBI.

Experiment 3: Behavioral Economics of Negative Reinforcement – Avoidance of Foot Shock.

Injury severity and Acute Signs. The impact pressure experienced and acute signs shown by rats in Experiment 3 are summarized in Table 1. Latency to recover the righting reflex was significantly longer for mTBI rats compared to sham rats ( $t(13) = -12.7$ ,  $p < .001$ ).

Acoustic Startle Response. ASR sensitivity for rats in Experiment 3 was suppressed by mTBI. The main effect of injury ( $F(1,13) = 6.3$ ,  $p = .026$ ) and the interaction of injury X

stimulus intensity ( $F(2,26) = 4.2, p = .026$ ) were significantly different between Sham and mTBI groups (Figure 1).

ASR magnitude was also significantly suppressed following mTBI. The interactions of injury X day ( $F(3,39) = 5.3, p = .004$ ), injury X stimulus intensity ( $F(2,26) = 7.5, p = .003$ ) and injury X day X stimulus intensity ( $F(6,78) = 3.3, p = .006$ ) were significantly different, even though the main effect of injury was not significant. Therefore, mTBI caused the suppression ASR sensitivity and magnitude in Experiment 3.

FR-1 Training. Sham and mTBI rats were trained to avoid foot shock using an FR-1 schedule. FR-1 training was conducted for 10 sessions, as avoidance learning requires more training than the escape response. Performance was measured by the proportion of trials with an avoidance response (data not shown). Sham and mTBI rats learned the avoidance response (main effect of session,  $F(9,108) = 13.9, p < .001$ ). Both groups did not differ in their acquisition of avoidance, as neither the main effect of injury nor the injury X session interaction was significant.

Demand Characteristics of Negative Reinforcement – Avoidance of Foot Shock. The effect of mTBI on the negative reinforcement of avoiding foot shock was investigated using a modified progressive ratio procedure, and the demand curve is shown in Figure 4. The hedonic value  $Q_0$  for avoiding foot shock was significantly reduced for mTBI rats as compared to Sham rats ( $F(1,10) = 20.0, p = .0012$ ). In contrast,  $\alpha$  for avoiding foot shock was not significantly different between injury groups ( $F(1,10) = 1.8, p = .209$ ). The fit of the exponentiated equation to actual data were excellent ( $r^2$  for sham = 0.97

and mTBI = 0.99). Thus, unlike the lack of effects of mTBI on the demand characteristics for obtaining sucrose and escaping from foot shock, mTBI reduced the reinforcing value of avoiding foot shock.

## Discussion

In the last 20 years, the concept of reinforcement has been refined to include different components, such as hedonic, motivational and learning.<sup>45, 46</sup> Similar distinctions of reinforcement have been applied to psychopathology where consummatory, motivational and decisional anhedonia have been suggested to occur in individuals to account for different symptoms.<sup>7, 47</sup> As far as we are aware, the effects of TBI on different aspects of anhedonia or reinforcement processing has not been investigated previously. By exploring the characteristics of demand and using behavioral economics analytic approaches, the current study sought to understand the effects of mTBI on hedonic and motivational components of reinforcement.

Mood disorders including depression and anxiety can differentially alter views of positively- and negatively-valenced stimuli or events. Stress due to encountering aversive events can precipitate or exacerbate depression and anxiety.<sup>25, 26</sup> Cognitive control can help an individual deal with or proactively reduce the effects of stressors.<sup>48</sup> Conversely, impaired cognitive control may lead to preoccupation of negative events, often referred to as negative bias in which attention to aversive events or thoughts is greater than to positive events or thoughts.<sup>49, 50</sup> Thus, a compelling case can be made that the study of negative reinforcement (i.e., termination or avoidance of negatively-

valenced events) is as relevant and important to the study of mood disorders as the study of positive reinforcement (occurrence of positively-valenced events).

In the present study, the effects of mTBI on the hedonic and motivational components of positive and negative reinforcement were investigated. Two types of negative reinforcement were assessed to determine the type of cognitive control affected by mTBI: escape (reactive control) and avoidance (proactive control) of foot shock (stressor). mTBI was produced using a lateral fluid percussion injury model. The impact pressure and acute signs were similar to our previous studies and to those previously reported for mild severity TBI.<sup>32, 33, 51-54</sup> Suppression of ASR was also observed after mTBI, as reported previously.<sup>32-34, 55</sup>

With regard to the main focus of this study, mTBI reduced the hedonic value of avoiding foot shock. In contrast, mTBI did not alter the hedonic value or the motivation to escape foot shock, as neither  $Q_0$  nor  $\alpha$  were significantly different between sham and mTBI groups. The fact that the hedonic value of *avoiding* but not *escaping* foot shock was impacted by mTBI point to a very specific impairment in negative reinforcement, in particular proactive rather than reactive control of a stressor. Thus, individuals with mTBI would find proactive coping of stress less reinforcing, and therefore be less likely to use this coping strategy to deal with stress.<sup>29, 49</sup> Importantly, cognitive behavioral therapy (CBT) is associated with enhanced activity in the cognitive control brain circuits of patients with major depression, suggesting CBT may be particularly efficacious in TBI-induced depression.<sup>56</sup>



The effect of mTBI on avoidance are unlikely to be due to changes in sensitivity to foot shock after TBI. mTBI did not change the hedonic value or the motivation to escape foot shock nor did mTBI alter thresholds to vocalize and flinch to foot shock. Moreover, the lack of effects of mTBI on escape from foot shock helps to rule out other explanations such as motor impairment or general learning deficit.

At present, we can only speculate on the manner in which mTBI impaired the hedonic value of avoidance and proactive control of stress. Expectancy is critical for proactive control and the dorsolateral prefrontal cortex (DLPFC) is involved in expectancy of goal-relevant emotional information. Sustained activation of the DLPFC in humans occurred during high expectancy conditions.<sup>57</sup> Another possibility is the dopaminergic system, which is important for conditioned avoidance. Lesions of dopaminergic terminals and dopaminergic antagonists impair foot shock avoidance, and dopamine release is correlated with avoidance responses.<sup>58-62</sup> TBI modifies neural circuits involving both DLPFC and dopamine systems.<sup>63-66</sup> While dopaminergic systems have largely been implicated in both positive and negative reinforcement, any mechanistic explanation of our results will have to include differential actions of TBI on avoidance of foot shock, but not escape or positive reinforcement.<sup>67, 68</sup>

Our results showing a lack of effect of mTBI on positive reinforcement are consistent with one study, but at odds with others. Severe lateral fluid percussion TBI in Wistar rats

led to no changes in sucrose preference at 1 to 6 months after injury, but fluid percussion TBI interacted with lipopolysaccharide (LPS) administration to decrease sucrose preference to a greater degree than LPS in sham mice 30 days after injury.<sup>14, 15</sup> Controlled cortical impact (CCI) injury in Sprague Dawley rats resulted in lower sucrose preference at 1 week and 5.5 months after injury.<sup>12, 69</sup> Finally, repetitive closed head injury (2 injuries, 24 hours apart) decreased sucrose preference 2 weeks after injury.<sup>70</sup> In general, reduced sucrose preference was observed after TBI in rodents suggesting anhedonia for positive reinforcement, in line with anhedonia observed in TBI patients. In the present study, sucrose preference after mTBI was not changed nor was hedonic value or motivation to obtain sucrose using an operant procedure with behavioral economics analyses. It is possible that the differences between our results and previous findings are due to the nature of the injury (fluid percussion vs CCI vs closed head injury), severity or location of injury.

In summary, the present study investigated the effects of mTBI on different components of positive and negative reinforcement. mTBI reduced the hedonic value of avoiding foot shock, but did not modify other aspects of avoidance or escape of foot shock or obtaining sucrose. Thus, results of the present study suggest that mTBI impairs proactive coping of stress through a reduction in hedonic value, which may ultimately lead to depression.

## **Acknowledgement**

Supported by Merit Award (I01BX000132) to KCHP and Career Development Award (I01BX007080) to AMF, both from the Biomedical Laboratory Research & Development Service of the VA Office of Research and Development, and Graduate/Post-Doctoral Fellowship grant (CBIR14FELO14) to PA from New Jersey Commission on Brain Injury Research.

The views expressed in this article are those of the authors and do not necessarily reflect the position or policy of the Department of Veterans Affairs or the United States government.

## **Author Disclosure Statement**

All authors have no competing financial interests to declare.

## References

1. Center for Disease Control and Prevention (2018). <https://www.cdc.gov/traumaticbraininjury/data/index.html>.
2. Fann, J.R., Burington, B., Leonetti, A., Jaffe, K., Katon, W.J. and Thompson, R.S. (2004). Psychiatric illness following traumatic brain injury in an adult health maintenance organization population. *Archives of general psychiatry* 61, 53-61.
3. Jorge, R.E. and Starkstein, S.E. (2005). Pathophysiologic aspects of major depression following traumatic brain injury. *The Journal of head trauma rehabilitation* 20, 475-487.
4. Grillo, L. (2016). A Possible Role of Anhedonia as Common Substrate for Depression and Anxiety. *Depress Res Treat* 2016, 1598130.
5. Berridge, K.C. and Robinson, T.E. (1998). What is the role of dopamine in reward: hedonic impact, reward learning, or incentive salience? *Brain research. Brain research reviews* 28, 309-369.
6. Salamone, J.D. and Correa, M. (2012). The mysterious motivational functions of mesolimbic dopamine. *Neuron* 76, 470-485.
7. Treadway, M.T. and Zald, D.H. (2011). Reconsidering anhedonia in depression: lessons from translational neuroscience. *Neuroscience and biobehavioral reviews* 35, 537-555.
8. Gold, J.M., Waltz, J.A., Prentice, K.J., Morris, S.E. and Heerey, E.A. (2008). Reward processing in schizophrenia: a deficit in the representation of value. *Schizophrenia bulletin* 34, 835-847.
9. Leyton, M. and Vezina, P. (2013). Striatal ups and downs: their roles in vulnerability to addictions in humans. *Neuroscience and biobehavioral reviews* 37, 1999-2014.
10. Yang, X.H., Huang, J., Zhu, C.Y., Wang, Y.F., Cheung, E.F., Chan, R.C. and Xie, G.R. (2014). Motivational deficits in effort-based decision making in individuals with subsyndromal depression, first-episode and remitted depression patients. *Psychiatry research* 220, 874-882.
11. Cope, E.C., Morris, D.R., Scrimgeour, A.G. and Levenson, C.W. (2012). Use of zinc as a treatment for traumatic brain injury in the rat: effects on cognitive and behavioral outcomes. *Neurorehabilitation and neural repair* 26, 907-913.
12. Missault, S., Anckaerts, C., Blockx, I., Deleye, S., Van Dam, D., Barriche, N., De Pauw, G., Aertgeerts, S., Valkenburg, F., De Deyn, P.P., Verhaeghe, J., Wyffels, L., Van der Linden, A., Staelens, S., Verhoye, M. and Dedeurwaerdere, S. (2018). Neuroimaging of Subacute Brain Inflammation and Microstructural Changes Predicts Long-Term Functional Outcome after Experimental Traumatic Brain Injury. *Journal of neurotrauma*.
13. Kuo, J.R., Cheng, Y.H., Chen, Y.S., Chio, C.C. and Gean, P.W. (2013). Involvement of extracellular signal regulated kinases in traumatic brain injury-induced depression in rodents. *Journal of neurotrauma* 30, 1223-1231.
14. Fenn, A.M., Gensel, J.C., Huang, Y., Popovich, P.G., Lifshitz, J. and Godbout, J.P. (2014). Immune activation promotes depression 1 month after diffuse brain injury: a role for primed microglia. *Biol Psychiatry* 76, 575-584.
15. Jones, N.C., Cardamone, L., Williams, J.P., Salzberg, M.R., Myers, D. and O'Brien, T.J. (2008). Experimental traumatic brain injury induces a pervasive hyperanxious phenotype in rats. *Journal of neurotrauma* 25, 1367-1374.

16. Tucker, L.B., Burke, J.F., Fu, A.H. and McCabe, J.T. (2017). Neuropsychiatric Symptom Modeling in Male and Female C57BL/6J Mice after Experimental Traumatic Brain Injury. *Journal of neurotrauma* 34, 890-905.
17. Hursh, S.R. (1984). Behavioral economics. *Journal of the experimental analysis of behavior* 42, 435-452.
18. Bylsma, L.M., Morris, B.H. and Rottenberg, J. (2008). A meta-analysis of emotional reactivity in major depressive disorder. *Clinical psychology review* 28, 676-691.
19. Amir, N., Elias, J., Klumpp, H. and Przeworski, A. (2003). Attentional bias to threat in social phobia: facilitated processing of threat or difficulty disengaging attention from threat? *Behaviour research and therapy* 41, 1325-1335.
20. Bar-Haim, Y., Lamy, D., Pergamin, L., Bakermans-Kranenburg, M.J. and van, I.M.H. (2007). Threat-related attentional bias in anxious and nonanxious individuals: a meta-analytic study. *Psychological bulletin* 133, 1-24.
21. Eysenck, M.W., Derakshan, N., Santos, R. and Calvo, M.G. (2007). Anxiety and cognitive performance: attentional control theory. *Emotion (Washington, D.C)* 7, 336-353.
22. Mogg, K., Bradley, B.P. and Williams, R. (1995). Attentional bias in anxiety and depression: the role of awareness. *The British journal of clinical psychology / the British Psychological Society* 34 ( Pt 1), 17-36.
23. McMakin, D.L., Olino, T.M., Porta, G., Dietz, L.J., Emslie, G., Clarke, G., Wagner, K.D., Asarnow, J.R., Ryan, N.D., Birmaher, B., Shamseddeen, W., Mayes, T., Kennard, B., Spirito, A., Keller, M., Lynch, F.L., Dickerson, J.F. and Brent, D.A. (2012). Anhedonia predicts poorer recovery among youth with selective serotonin reuptake inhibitor treatment-resistant depression. *Journal of the American Academy of Child and Adolescent Psychiatry* 51, 404-411.
24. Thomas, R.K., Baker, G., Lind, J. and Dursun, S. (2018). Rapid effectiveness of intravenous ketamine for ultraresistant depression in a clinical setting and evidence for baseline anhedonia and bipolarity as clinical predictors of effectiveness. *Journal of psychopharmacology* 32, 1110-1117.
25. Kendler, K.S., Karkowski, L.M. and Prescott, C.A. (1999). Causal relationship between stressful life events and the onset of major depression. *The American journal of psychiatry* 156, 837-841.
26. Kessler, R.C. (1997). The effects of stressful life events on depression. *Annu Rev Psychol* 48, 191-214.
27. Compton, R.J., Arnstein, D., Freedman, G., Dainer-Best, J., Liss, A. and Robinson, M.D. (2011). Neural and behavioral measures of error-related cognitive control predict daily coping with stress. *Emotion (Washington, D.C)* 11, 379-390.
28. Braver, T.S. (2012). The variable nature of cognitive control: a dual mechanisms framework. *Trends in cognitive sciences* 16, 106-113.
29. De Raedt, R. and Koster, E.H. (2010). Understanding vulnerability for depression from a cognitive neuroscience perspective: A reappraisal of attentional factors and a new conceptual framework. *Cognitive, affective & behavioral neuroscience* 10, 50-70.
30. Fragale, J.E., Beck, K.D. and Pang, K.C. (2017). Use of the Exponential and Exponentiated Demand Equations to Assess the Behavioral Economics of Negative Reinforcement. *Frontiers in neuroscience* 11, 77.

31. Spiegler, K.M., Fortress, A.M. and Pang, K.C.H. (2018). Differential use of danger and safety signals in an animal model of anxiety vulnerability: The behavioral economics of avoidance. *Progress in neuro-psychopharmacology & biological psychiatry* 82, 195-204.
32. Pang, K.C., Sinha, S., Avcu, P., Roland, J.J., Nadpara, N., Pfister, B., Long, M., Santhakumar, V. and Servatius, R.J. (2015). Long-lasting suppression of acoustic startle response after mild traumatic brain injury. *Journal of neurotrauma* 32, 801-810.
33. Sinha, S.P., Avcu, P., Spiegler, K.M., Komaravolu, S., Kim, K., Cominski, T., Servatius, R.J. and Pang, K.C. (2017). Startle suppression after mild traumatic brain injury is associated with an increase in pro-inflammatory cytokines, reactive gliosis and neuronal loss in the caudal pontine reticular nucleus. *Brain, behavior, and immunity* 61, 353-364.
34. Servatius, R.J., Marx, C.E., Sinha, S., Avcu, P., Kilts, J.D., Naylor, J.C. and Pang, K.C. (2016). Brain and Serum Androsterone Is Elevated in Response to Stress in Rats with Mild Traumatic Brain Injury. *Frontiers in neuroscience* 10, 379.
35. Neuberger, E.J., Abdul Wahab, R., Jayakumar, A., Pfister, B.J. and Santhakumar, V. (2014). Distinct effect of impact rise times on immediate and early neuropathology after brain injury in juvenile rats. *Journal of neuroscience research*.
36. Cernak, I. (2005). Animal models of head trauma. *NeuroRx : the journal of the American Society for Experimental NeuroTherapeutics* 2, 410-422.
37. Johnson, V.E., Meaney, D.F., Cullen, D.K. and Smith, D.H. (2015). Animal models of traumatic brain injury. *Handbook of clinical neurology* 127, 115-128.
38. Petraglia, A.L., Dashnaw, M.L., Turner, R.C. and Bailes, J.E. (2014). Models of mild traumatic brain injury: translation of physiological and anatomic injury. *Neurosurgery* 75 Suppl 4, S34-49.
39. Abdul-Wahab, R., Swietek, B., Mina, S., Sampath, S., Santhakumar, V. and Pfister, B.J. (2011). Precisely controllable traumatic brain injury device for rodent models. *IEEE 37th Annual Northeast* 1, 22011.
40. Koffarnus, M.N., Franck, C.T., Stein, J.S. and Bickel, W.K. (2015). A modified exponential behavioral economic demand model to better describe consumption data. *Exp Clin Psychopharmacol* 23, 504-512.
41. Bentzley, B.S., Zhou, T.C. and Aston-Jones, G. (2014). Economic demand predicts addiction-like behavior and therapeutic efficacy of oxytocin in the rat. *Proceedings of the National Academy of Sciences of the United States of America* 111, 11822-11827.
42. Hursh, S.R., Raslear, T.G., Shurtleff, D., Bauman, R. and Simmons, L. (1988). A cost-benefit analysis of demand for food. *Journal of the experimental analysis of behavior* 50, 419-440.
43. Hursh, S.R. and Winger, G. (1995). Normalized demand for drugs and other reinforcers. *Journal of the experimental analysis of behavior* 64, 373-384.
44. Servatius, R.J., Jiao, X., Beck, K.D., Pang, K.C. and Minor, T.R. (2008). Rapid avoidance acquisition in Wistar-Kyoto rats. *Behavioural brain research* 192, 191-197.
45. Berridge, K.C. (1996). Food reward: brain substrates of wanting and liking. *Neuroscience and biobehavioral reviews* 20, 1-25.

46. Salamone, J.D., Correa, M., Nunes, E.J., Randall, P.A. and Pardo, M. (2012). The behavioral pharmacology of effort-related choice behavior: dopamine, adenosine and beyond. *Journal of the experimental analysis of behavior* 97, 125-146.
47. Treadway, M.T. and Zald, D.H. (2013). Parsing Anhedonia: Translational Models of Reward-Processing Deficits in Psychopathology. *Curr Dir Psychol Sci* 22, 244-249.
48. De Raedt, R. and Hooley, J.M. (2016). The role of expectancy and proactive control in stress regulation: A neurocognitive framework for regulation expectation. *Clinical psychology review* 45, 45-55.
49. Vanderhasselt, M.A., De Raedt, R., De Paepe, A., Aarts, K., Otte, G., Van Dorpe, J. and Pourtois, G. (2014). Abnormal proactive and reactive cognitive control during conflict processing in major depression. *Journal of abnormal psychology* 123, 68-80.
50. Joormann, J. and Quinn, M.E. (2014). Cognitive processes and emotion regulation in depression. *Depression and anxiety* 31, 308-315.
51. Eakin, K. and Miller, J.P. (2012). Mild traumatic brain injury is associated with impaired hippocampal spatiotemporal representation in the absence of histological changes. *Journal of neurotrauma* 29, 1180-1187.
52. Griesbach, G.S., Gomez-Pinilla, F. and Hovda, D.A. (2007). Time window for voluntary exercise-induced increases in hippocampal neuroplasticity molecules after traumatic brain injury is severity dependent. *Journal of neurotrauma* 24, 1161-1171.
53. Perez-Polo, J.R., Rea, H.C., Johnson, K.M., Parsley, M.A., Unabia, G.C., Xu, G., Infante, S.K., Dewitt, D.S. and Hulsebosch, C.E. (2013). Inflammatory consequences in a rodent model of mild traumatic brain injury. *Journal of neurotrauma* 30, 727-740.
54. Teng, S.X. and Molina, P.E. (2014). Acute alcohol intoxication prolongs neuroinflammation without exacerbating neurobehavioral dysfunction following mild traumatic brain injury. *Journal of neurotrauma* 31, 378-386.
55. Xing, G., Barry, E.S., Benford, B., Grunberg, N.E., Li, H., Watson, W.D. and Sharma, P. (2013). Impact of repeated stress on traumatic brain injury-induced mitochondrial electron transport chain expression and behavioral responses in rats. *Frontiers in neurology* 4, 196.
56. Yang, Z., Oathes, D.J., Linn, K.A., Bruce, S.E., Satterthwaite, T.D., Cook, P.A., Satchell, E.K., Shou, H. and Sheline, Y.I. (2018). Cognitive Behavioral Therapy Is Associated With Enhanced Cognitive Control Network Activity in Major Depression and Posttraumatic Stress Disorder. *Biol Psychiatry Cogn Neurosci Neuroimaging* 3, 311-319.
57. Krug, M.K. and Carter, C.S. (2012). Proactive and reactive control during emotional interference and its relationship to trait anxiety. *Brain research* 1481, 13-36.
58. Arnt, J. (1982). Pharmacological specificity of conditioned avoidance response inhibition in rats: inhibition by neuroleptics and correlation to dopamine receptor blockade. *Acta Pharmacol Toxicol (Copenh)* 51, 321-329.
59. Wadenberg, M.L., Ericson, E., Magnusson, O. and Ahlenius, S. (1990). Suppression of conditioned avoidance behavior by the local application of (-)sulpiride into the ventral, but not the dorsal, striatum of the rat. *Biol Psychiatry* 28, 297-307.

60. McCullough, L.D., Sokolowski, J.D. and Salamone, J.D. (1993). A neurochemical and behavioral investigation of the involvement of nucleus accumbens dopamine in instrumental avoidance. *Neuroscience* 52, 919-925.
61. Pultorak, K.J., Schelp, S.A., Isaacs, D.P., Krzystyniak, G. and Oleson, E.B. (2018). A Transient Dopamine Signal Represents Avoidance Value and Causally Influences the Demand to Avoid. *eNeuro* 5.
62. Oleson, E.B., Gentry, R.N., Chioma, V.C. and Cheer, J.F. (2012). Subsecond dopamine release in the nucleus accumbens predicts conditioned punishment and its successful avoidance. *J Neurosci* 32, 14804-14808.
63. Ware, A.L., Biekman, B., Hachey, R., MacLeod, M., Bird, W., Pathak, S., Clarke, E., Borrasso, A., Puccio, A.M., Glavin, K., Pomiecko, K., Moretti, P., Beers, S.R., Levin, H.S., Schneider, W., Okonkwo, D.O. and Wilde, E.A. (2018). A Preliminary High-Definition Fiber Tracking Study of the Executive Control Network in Blast-Induced Traumatic Brain Injury. *Journal of neurotrauma*.
64. Huang, M.X., Harrington, D.L., Robb Swan, A., Angeles Quinto, A., Nichols, S., Drake, A., Song, T., Diwakar, M., Huang, C.W., Risbrough, V.B., Dale, A., Bartsch, H., Matthews, S., Huang, J.W., Lee, R.R. and Baker, D.G. (2017). Resting-State Magnetoencephalography Reveals Different Patterns of Aberrant Functional Connectivity in Combat-Related Mild Traumatic Brain Injury. *Journal of neurotrauma* 34, 1412-1426.
65. Chen, Y.H., Huang, E.Y., Kuo, T.T., Ma, H.I., Hoffer, B.J., Tsui, P.F., Tsai, J.J., Chou, Y.C. and Chiang, Y.H. (2015). Dopamine Release Impairment in Striatum After Different Levels of Cerebral Cortical Fluid Percussion Injury. *Cell transplantation* 24, 2113-2128.
66. Yan, H.Q., Osier, N.D., Korpon, J., Bales, J.W., Kline, A.E., Wagner, A.K. and Dixon, C.E. (2015). Persistent Cognitive Deficits: Implications of Altered Dopamine in Traumatic Brain Injury. In: *Brain Neurotrauma: Molecular, Neuropsychological, and Rehabilitation Aspects*. Kobeissy, F.H. (ed): Boca Raton (FL).
67. Schelp, S.A., Pultorak, K.J., Rakowski, D.R., Gomez, D.M., Krzystyniak, G., Das, R. and Oleson, E.B. (2017). A transient dopamine signal encodes subjective value and causally influences demand in an economic context. *Proceedings of the National Academy of Sciences of the United States of America* 114, E11303-E11312.
68. Schultz, W., Stauffer, W.R. and Lak, A. (2017). The phasic dopamine signal maturing: from reward via behavioural activation to formal economic utility. *Current opinion in neurobiology* 43, 139-148.
69. Darkazalli, A., Ismail, A.A., Abad, N., Grant, S.C. and Levenson, C.W. (2016). Use of human mesenchymal stem cell treatment to prevent anhedonia in a rat model of traumatic brain injury. *Restorative neurology and neuroscience* 34, 433-441.
70. Klemenhagen, K.C., O'Brien, S.P. and Brody, D.L. (2013). Repetitive concussive traumatic brain injury interacts with post-injury foot shock stress to worsen social and depression-like behavior in mice. *PLoS one* 8, e74510.



Table 1. Injury pressure and acute signs. Mean  $\pm$  S.E.M.

|              | Condition    | Impact Pressure (psi) | Recovery of Righting Reflex (s) | Apnea Duration (s) |
|--------------|--------------|-----------------------|---------------------------------|--------------------|
| Experiment 1 | Sham (n = 6) | NA                    | 90 $\pm$ 28                     | NA                 |
| (Sucrose)    | mTBI (n = 5) | 21.5 $\pm$ 1.1        | 492 $\pm$ 45 *                  | 13.3 $\pm$ 3.9     |
| Experiment 2 | Sham (n = 7) | NA                    | 95 $\pm$ 28                     | NA                 |
| (Escape)     | mTBI (n = 8) | 25.0 $\pm$ 1.0        | 579 $\pm$ 101 *                 | 16.7 $\pm$ 6.3     |
| Experiment 3 | Sham (n = 7) | NA                    | 118 $\pm$ 25                    | NA                 |
| (Avoidance)  | mTBI (n = 8) | 22.1 $\pm$ 1.3        | 496 $\pm$ 16.8 *                | 8.4 $\pm$ 1.7      |

\* = significantly different from Sham,  $p \leq .001$

Table 2. Timeline of Behavioral Testing

|             | Behavior                  | Start after injury (day) | Duration (Days) |
|-------------|---------------------------|--------------------------|-----------------|
| Exp. 1      | Acoustic Startle Response | Pre-injury, 1, 7, 14     | 1               |
| (Sucrose)   | Sucrose Preference        | 9                        | 2               |
|             | FR-1 Training             | 14                       | 7               |
|             | Demand Characteristics    | 21                       | 3               |
|             | Foot shock Sensitivity    | 24                       | 1               |
| Exp. 2      | Acoustic Startle Response | Pre-injury, 1, 7, 14     | 1               |
| (Escape)    | FR-1 Training             | 18                       | 7               |
|             | Demand Characteristics    | 25                       | 3               |
| Exp. 3      | Acoustic Startle Response | Pre-injury, 1, 7, 14     | 1               |
| (Avoidance) | FR-1 Training             | 9                        | 21              |
|             | Demand Characteristics    | 33                       | 5               |

Table 3. Experiment 1 - Sucrose Preference and Foot Shock Sensitivity. Mean  $\pm$  S.E.M.

| Condition | Sucrose Preference (%) | Vocalization Threshold (mA) | Flinch Threshold (mA) |
|-----------|------------------------|-----------------------------|-----------------------|
| Sham      | 93.5 $\pm$ 1.6         | .30 $\pm$ .04               | .52 $\pm$ .03         |
| mTBI      | 87.2 $\pm$ 5.5         | .22 $\pm$ .02               | .50 $\pm$ .08         |

## Figure Legends

Figure 1. Magnitude of acoustic startle responses (ASR) was suppressed following mTBI. ASR was obtained from rats in Experiments 1, 2 and 3 prior to injury and 1, 7 and 14 days after mTBI. The magnitude of ASR was suppressed in all experiments, as demonstrated by significant main effects of injury and interactions involving injury with stimulus intensity and day (see text discussion of statistical results). Similar effects of mTBI were observed for sensitivity of ASR (data not shown, see text discussion of statistical results).

Figure 2. Effects of mTBI on demand for sucrose. After learning to lever press to obtain sucrose pellets, a demand curve was obtained using a modified progressive ratio procedure (A). Neither  $Q_0$  (B) nor  $\alpha$  (C) were different between sham and mTBI rats, demonstrating that neither hedonic value of sucrose nor the motivation to obtain sucrose was altered by mTBI.

Figure 3. Effects of mTBI on escape from foot shock. Rats learned to lever press to escape foot shock (1mA, 0.5s). After acquisition, a demand curve was obtained using a modified progressive ratio procedure (A). Neither  $Q_0$  (B) nor  $\alpha$  (C) were different between sham and mTBI rats, demonstrating that mTBI did not alter the hedonic value of escaping foot shock or the motivation to escape foot shock. These results suggest that mTBI does not alter reactive control of stress.

Figure 4. Effects of mTBI on avoidance of foot shock. After learning to lever press to avoid foot shock (1mA, 0.5s), a demand curve for avoidance was obtained using a modified progressive ratio procedure (A).  $Q_0$  was reduced by mTBI, suggesting a reduction of the hedonic value of an avoidance response. In contrast,  $\alpha$  was not altered by mTBI. The differential effect of mTBI on avoidance but not escape of foot shock supports the idea that mTBI impairs proactive, but not reactive, control of stress by reducing the reinforcing value of avoidance responding.

Figure 1.

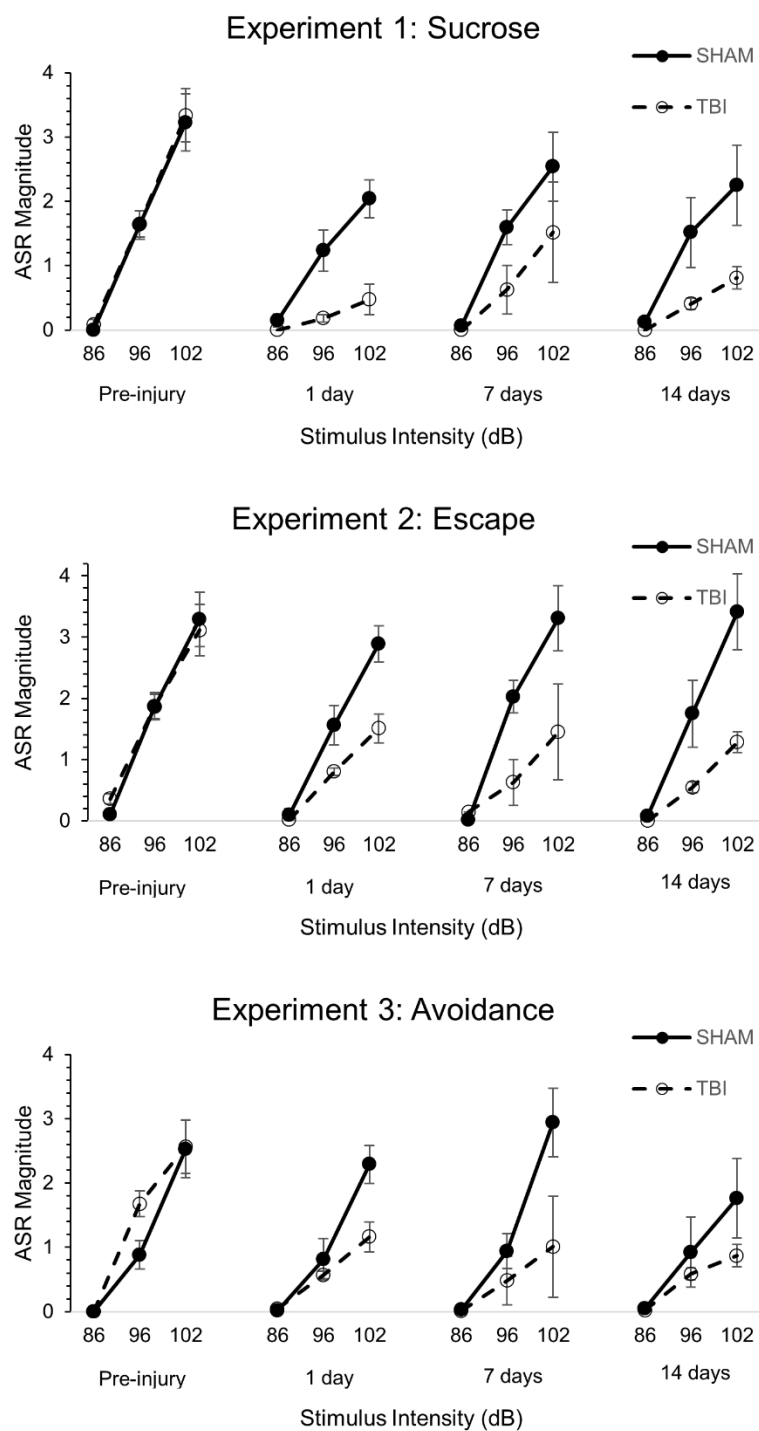

Figure 2.

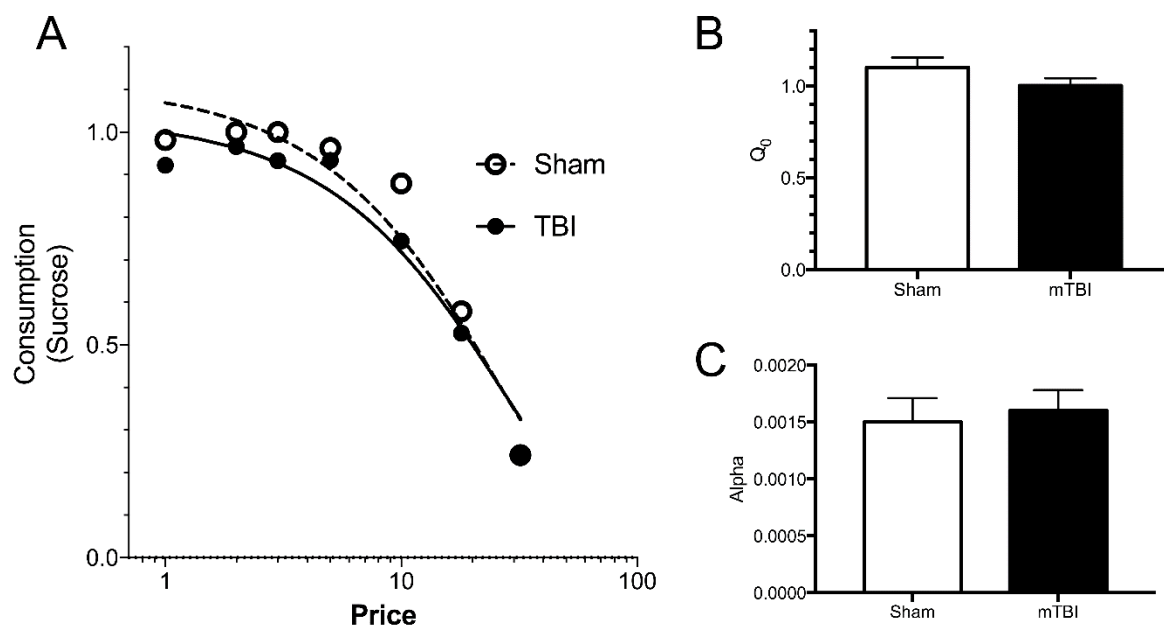

Figure 3.

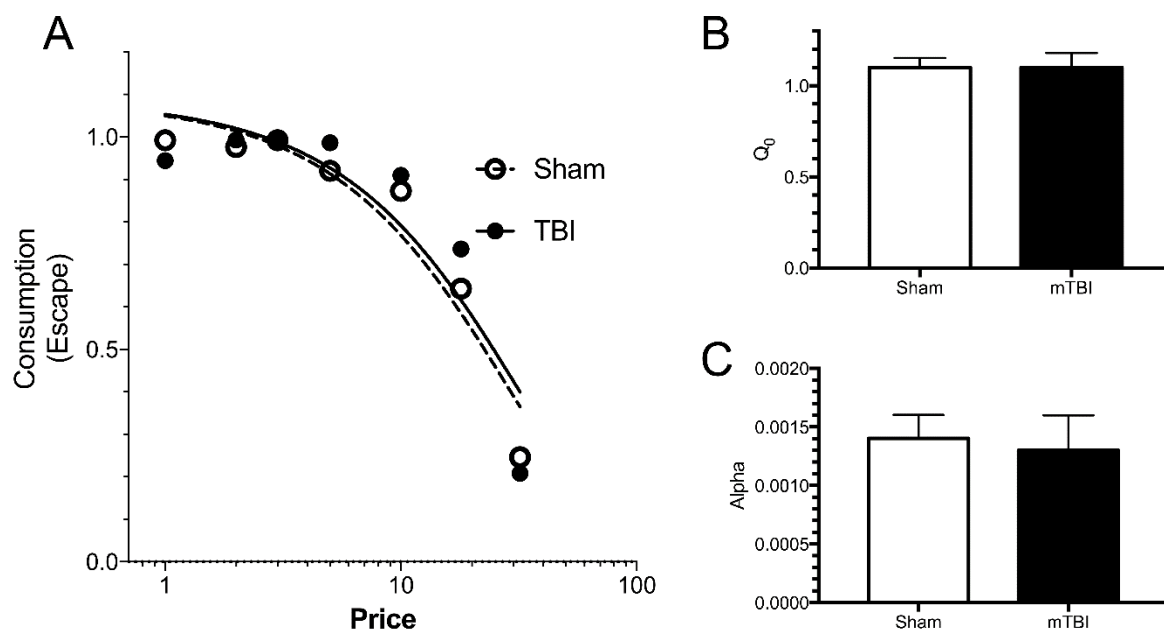

Figure 4.

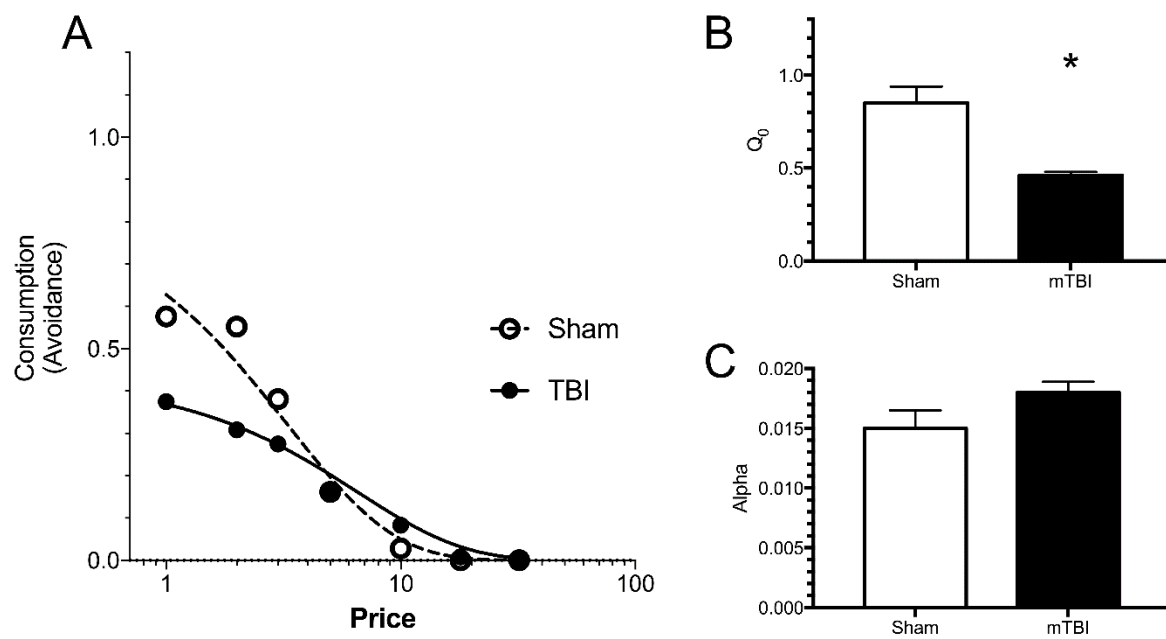

Source: https://www.biorxiv.org/content/10.1101/527895v1.full.pdf
